# Supplementary material for: Design, Radiosynthesis and Preliminary Biological Evaluation in Mice of a Brain-Penetrant 18F-Labelled σ2 Receptor Ligand
Source: MDPI journal article supplement (doi:10.3390/ijms22115447), 2021-05-21

## ***Supplemental Information***

**Design, radiosynthesis and preliminary biological evaluation in mice of a brain-penetrant  $^{18}\text{F}$ -labelled  $\sigma_2$  receptor ligand**

**Rareş-Petru Moldovan, Daniel Gündel, Rodrigo Teodoro, Friedrich-Alexander Ludwig, Steffen Fischer, Magali Toussaint, Dirk Schepmann, Bernhard Wünsch, Peter Brust, Winnie Deuther-Conrad**

### **Content:**

- 1. Manual radiosynthesis of [ $^{18}\text{F}$ ]RM273**
- 2. Automated radiosynthesis of [ $^{18}\text{F}$ ]RM273**
- 3. Quantification of radiometabolites in mouse**
- 4.  $^1\text{H}$  NMR spectra of compounds 34-42, 44 and 45**

### 1. Manual radiosynthesis of [<sup>18</sup>F]RM273.

No-carrier-added (n.c.a.) [<sup>18</sup>F]fluoride was produced via the <sup>18</sup>O(p,n)<sup>18</sup>F nuclear reaction by irradiation of a [<sup>18</sup>O]H<sub>2</sub>O target (Hyox 18 enriched water; Rotem Industries Ltd, Mishor Yamin, Israel) on a Cyclone<sup>®</sup>18/9 (IBA RadioPharma Solutions, Louvain-la-Neuve, Belgium) with 18 MeV proton beam using a Nirta<sup>®</sup> [<sup>18</sup>F]fluoride XL target or [<sup>18</sup>O]H<sub>2</sub>O recycled by the established in-house method.<sup>(34)</sup> Starting with 1–2 GBq of n.c.a. [<sup>18</sup>F]fluoride, [<sup>18</sup>F]F<sup>–</sup>-containing anion resin [Sep-Pak<sup>®</sup> Accell Plus QMA Carbonate Plus light cartridge (Waters GmbH, Eschborn, Germany)] was eluted with a solution composed of 100 µL of tetra-n-butylammonium hydrogen carbonate (TBAHCO<sub>3</sub>, 0.075 M, ABX advanced biochemical compounds GmbH, Radeberg, Germany) and K<sub>2</sub>CO<sub>3</sub> (20 mg/mL solution, 0.6 mg, 4.3 µmol) in H<sub>2</sub>O/MeCN (1:4, v/v) in a total volume of 1.2 mL. The solution was transferred directly into a 5 mL microwave V-vial (CEM<sup>®</sup> Corporation, Matthews, NC, USA) and azeotropically dried under vacuum and argon flow in the microwave cavity (Discover PETwave microwave CEM<sup>®</sup> corporation, 50–60 °C, 75 W) for 8–10 min. Additional aliquots of MeCN (2 × 1.0 mL) were added during the drying process. After complete dryness, a solution containing the pinacol ester precursor **45** (2–5 µmol) and tetrakis(pyridine)copper(II) triflate [Cu(py)<sub>4</sub>(OTf)<sub>2</sub>] (7.5–15 µmol) in *N,N*-dimethylacetamide (DMA, 600 µL) and *tert*-butanol (*tert*-BuOH, 300 µL) was added to the reactive anhydrous [<sup>18</sup>F]TBAF. The reaction was monitored in different time points (up to 20 min) at 110–130 °C via radio-thin layer chromatography (radio-TLC) and high performance liquid chromatography (HPLC, see quality control section). After the completion of the reaction, the crude reaction mixture was diluted with 18 mL H<sub>2</sub>O and passed through a Sep-Pak<sup>®</sup> C18 Plus cartridge (Waters GmbH, Eschborn, Germany) to remove the excess of Cu(py)<sub>4</sub>(OTf)<sub>2</sub> and some UV impurities. The cartridge was then eluted with 2.5 mL of MeCN and further diluted with 2.5 mL of H<sub>2</sub>O. This solution was directly applied onto a semi-preparative HPLC system composed by a Reprosil-Pur C18-AQ column (Dr. Maisch HPLC GmbH, Germany) with an eluent of 58 % MeCN/20 mM NH<sub>4</sub>OAc<sub>aq.</sub> at a flow rate of 2.2 mL·min<sup>–1</sup>. [<sup>18</sup>F]RM273 was collected and diluted in 40 mL of H<sub>2</sub>O. Final purification was performed using a Sep-Pak<sup>®</sup> C18 Light cartridge (Waters, Milford, MA, USA) followed by elution with 1.3 mL of EtOH. To obtain an injectable solution, the solvent was concentrated under a gentle nitrogen stream at 70 °C and [<sup>18</sup>F]RM273 was formulated in a sterile isotonic saline solution (5–10 % EtOH, v/v). The identity of [<sup>18</sup>F]RM273 was verified by radio-HPLC analysis of an aliquot of the radiotracer solution co-injected with the corresponding reference compound **RM273**. Radiochemical and chemical purities were assessed by radio-TLC and analytical HPLC. Molar activities were determined based on aliquots taken from the formulation, and the mass determination for the corresponding reference standard was performed via a calibration curve obtained under the same analytical HPLC conditions (see quality control section).

## 2. Automated radiosynthesis of [ $^{18}\text{F}$ ]RM273.

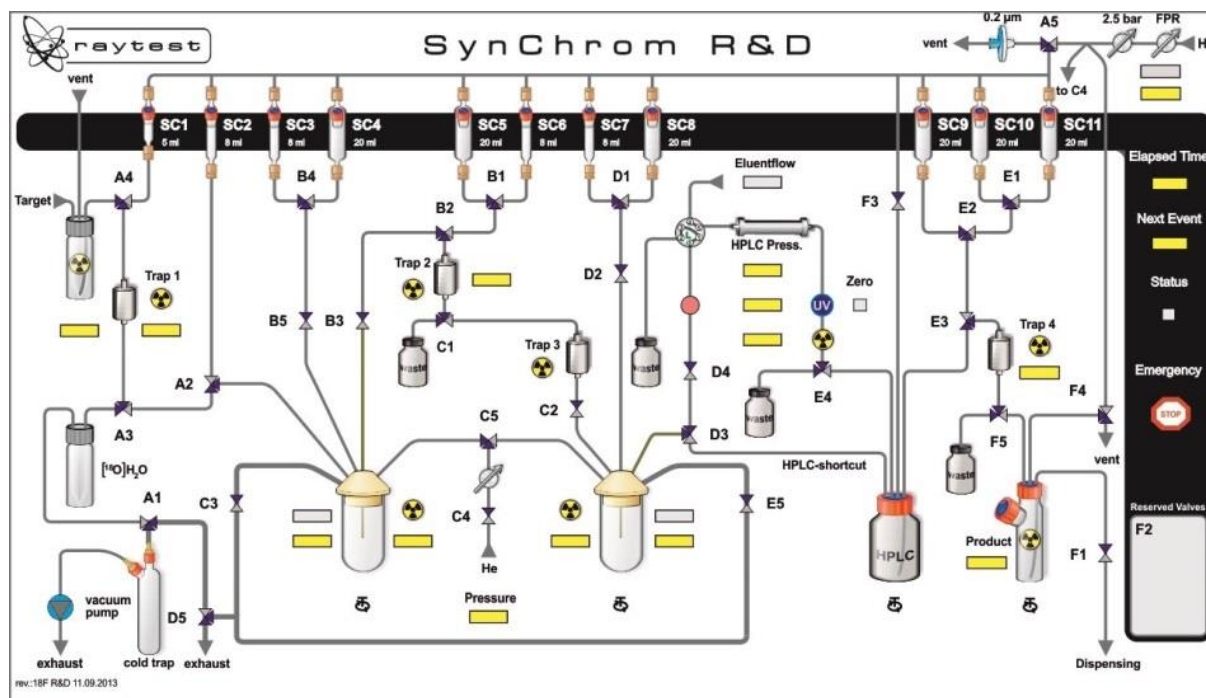

**Figure 1:** Schematic representation of the setup for the automated radiosynthesis of [ $^{18}\text{F}$ ]RM273 using the Synchrom R&D EVO III automated synthesizer (Elysia-Raytest, Germany). [ $^{18}\text{F}$ ]Fluoride (4-12 GBq) was trapped on a Waters QMA cartridge (Trap 1) and eluted with a solution (vial SC1) containing 100  $\mu\text{L}$  of TBAHCO<sub>3</sub> and 30  $\mu\text{L}$  K<sub>2</sub>CO<sub>3</sub> dissolved in a mixture of H<sub>2</sub>O/MeCN (1:4, v/v) into the reaction vessel and dried via azeotropic distillation. Additional 1.5 mL of dried MeCN was added (vial SC2). After complete dryness, a solution containing 1 mg of boronic acid pinacol ester **45** and 5 mg (7.5  $\mu\text{mol}$ ) Cu(py)<sub>4</sub>(OTf)<sub>2</sub> in DMA/*t*-BUOH (2:1, v/v, vial SC3) was added, and the reaction mixture was stirred at 130  $^{\circ}\text{C}$  for 10 min. To remove the excess of copper catalyst and some UV impurities a C18 light cartridge (Trap 2) was applied prior to semi-preparative the HPLC isolation. For that purpose, the reaction mixture was diluted with 18 mL H<sub>2</sub>O (vial SC4) and the cartridge eluted with 2.5 mL MeCN (vial SC5). After further dilution with 2.5 mL H<sub>2</sub>O (vial SC7), the solution was transferred to the semi-preparative HPLC. [ $^{18}\text{F}$ ]RM273 was collected in the HPLC collection vial containing 40 mL of H<sub>2</sub>O and trapped in the Sep-Pak<sup>®</sup> C18 light cartridge (Trap 4). The cartridge was washed with 2 mL H<sub>2</sub>O (vial SC10), and [ $^{18}\text{F}$ ]RM273 eluted with 1.3 mL EtOH (vial SC11).

### 3. Quantification of radiometabolites in mouse

Table 1. Radiometabolite analysis of [ $^{18}\text{F}$ ]RM273 in different tissues 30 min p.i.

|             | Experiment 1              |                   | Experiment 2              |                   |                           |                   |
|-------------|---------------------------|-------------------|---------------------------|-------------------|---------------------------|-------------------|
|             | Mouse 1                   |                   | Mouse 2                   |                   | Mouse 3                   |                   |
|             | Extraction efficiency (%) | Intact tracer (%) | Extraction efficiency (%) | Intact tracer (%) | Extraction efficiency (%) | Intact tracer (%) |
| Plasma      | 88                        | 23                | 85                        | 37                | 84                        | 28                |
| Brain       | 96                        | 100               | 96                        | 100               | 94                        | 100               |
| Liver       | 91                        | 34                | 91                        | 36                | 92                        | 28                |
| Pancreas    | 98                        | 100               | 98                        | 96                | 98                        | 96                |
| Bone Marrow | //                        | //                | 98                        | 97                | 99                        | 97                |

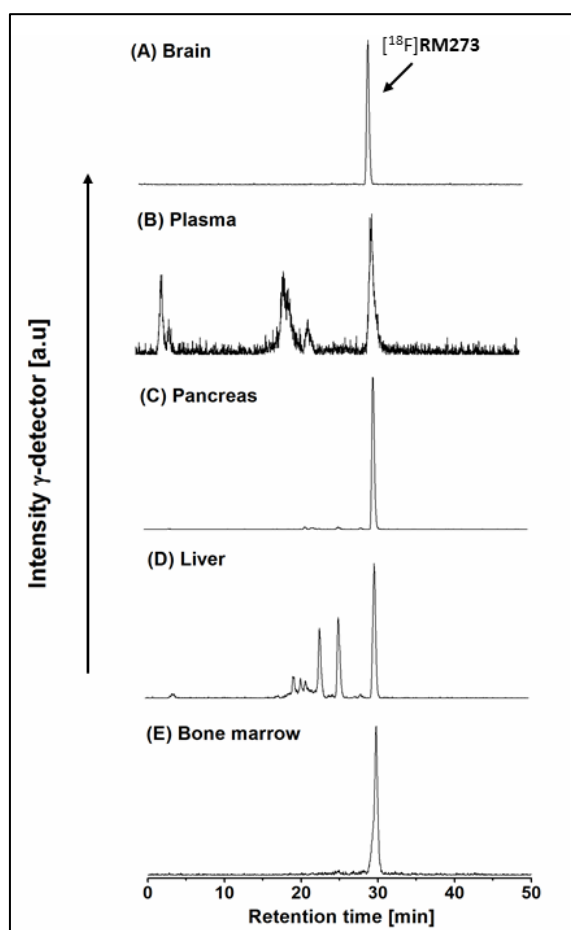

**Figure 2.** Representative radio-HPLC chromatograms of the metabolism studies of [ $^{18}\text{F}$ ]RM273 in different tissues obtained at 30 min p.i.. (A) Brain, (B) Plasma, (C) Pancreas, (D) Liver and (E) Bone marrow. Conditions: Reprosil-Pur C18-AQ (250 x 4.6 mm; 5  $\mu\text{m}$ ); gradient (eluent A 10% MeCN/20 mM  $\text{NH}_4\text{OAc}_{\text{aq}}$ ; eluent B 90 % MeCN/20 mM  $\text{NH}_4\text{OAc}_{\text{aq}}$ ; 0–10 min 100 % A, 10–30 min up to 100 % B, 30–35 min 100 % B, 35–36 min 100 % A, 36–45 min 100 % A); flow: 1 mL $\cdot\text{min}^{-1}$ .

#### 4. $^1\text{H}$ NMR spectra of compounds 34-42, 44 and 45

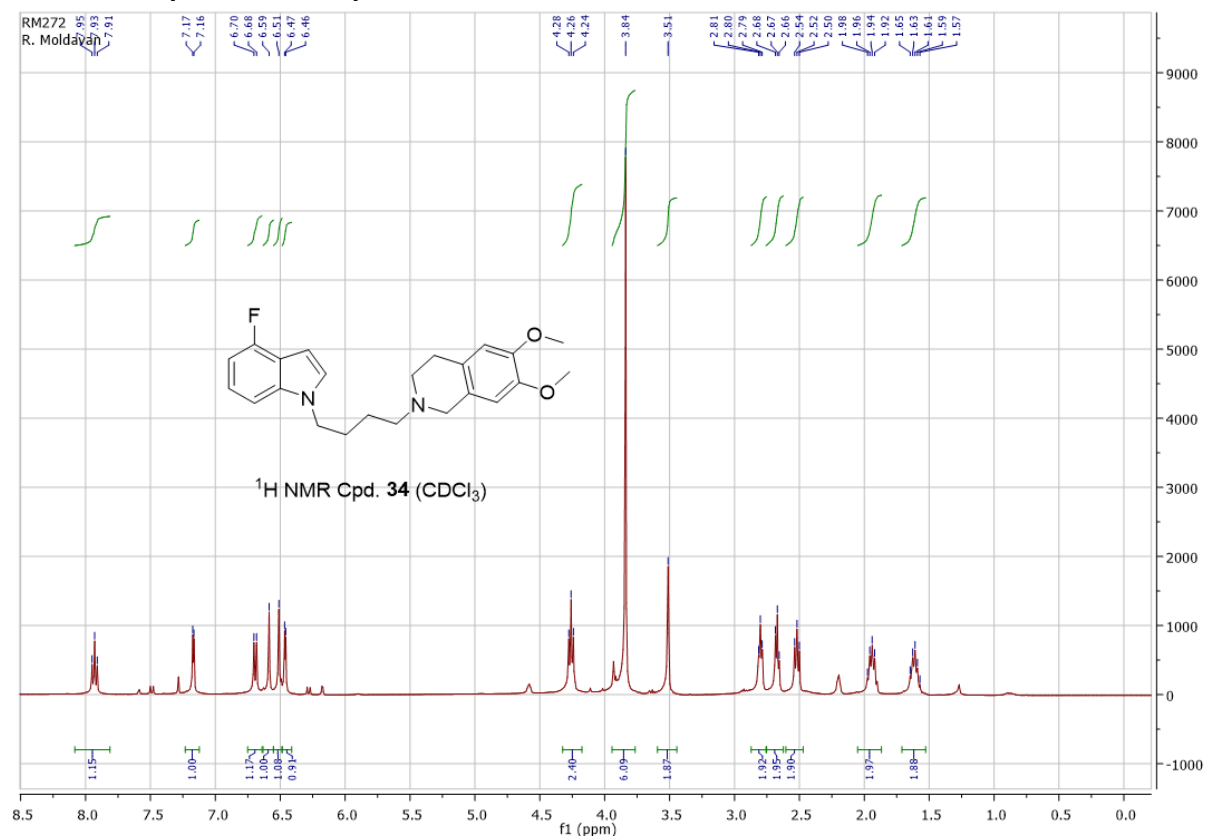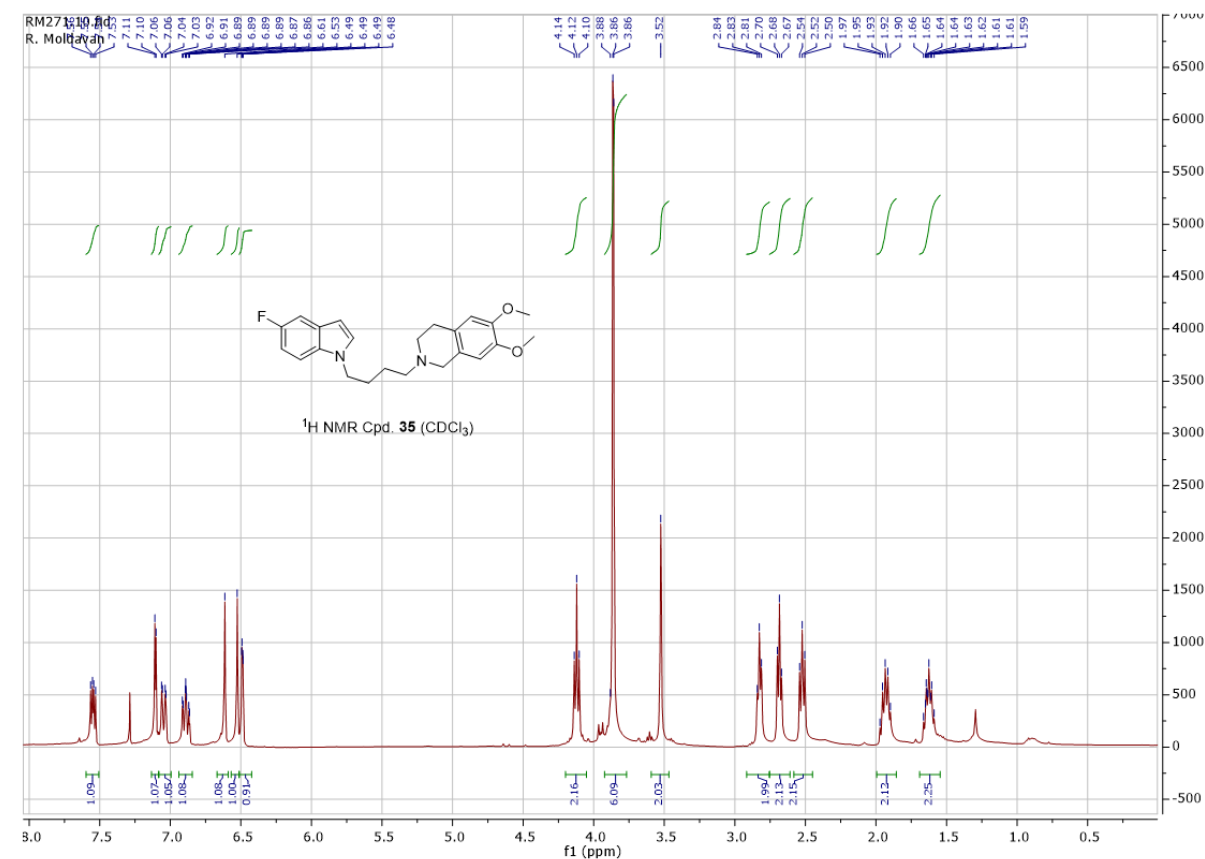

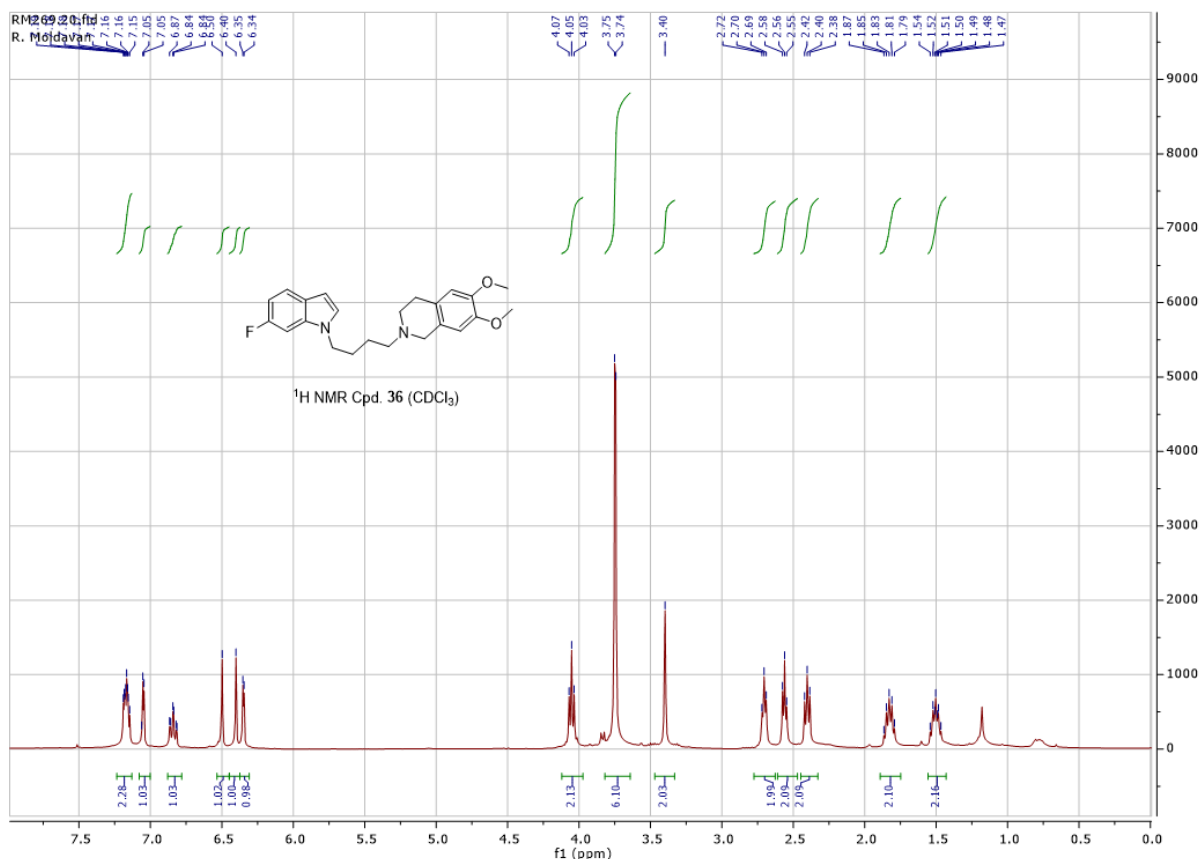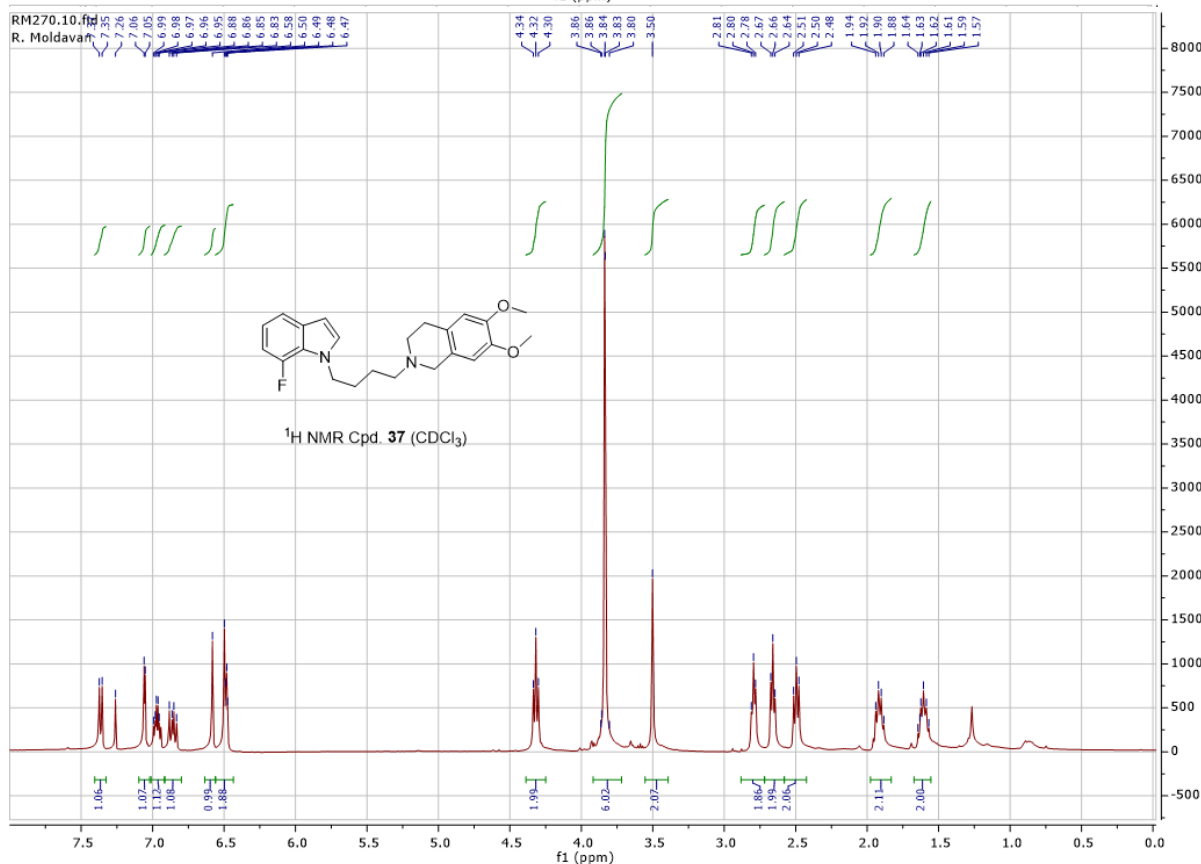

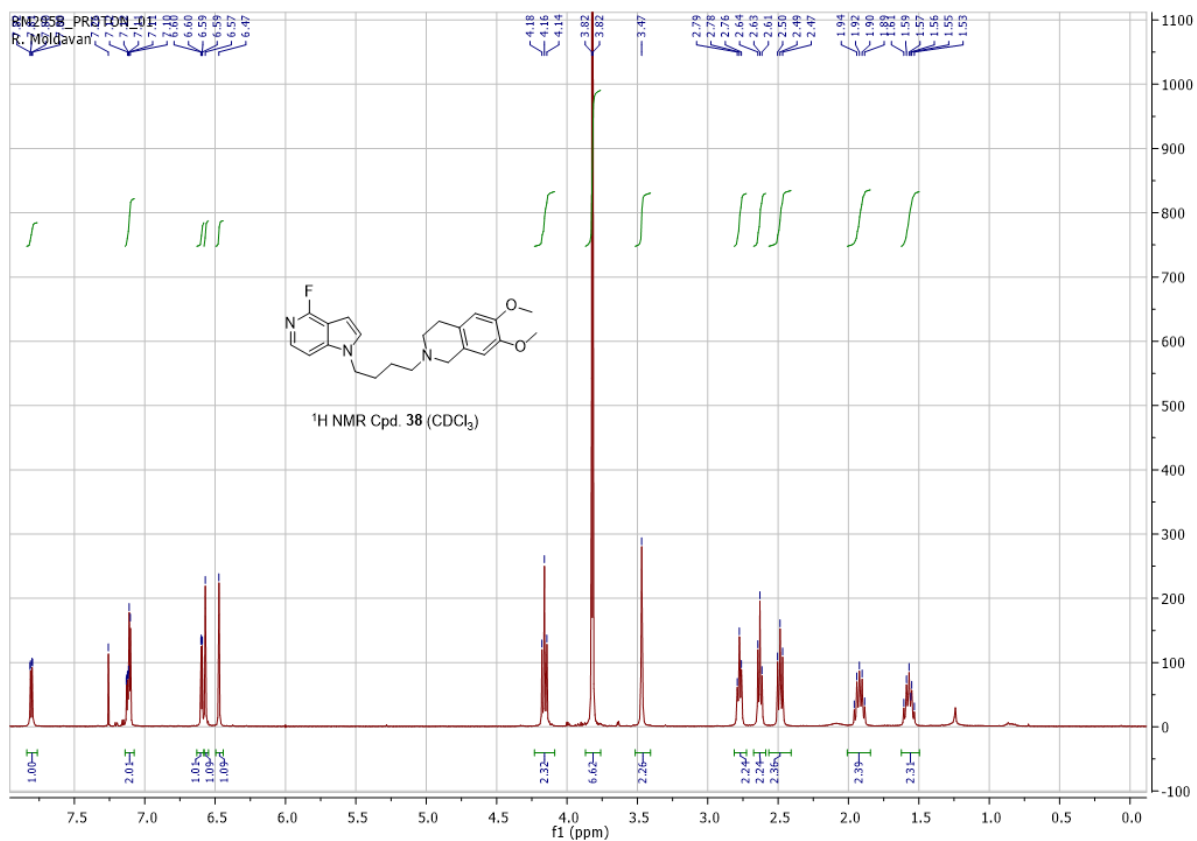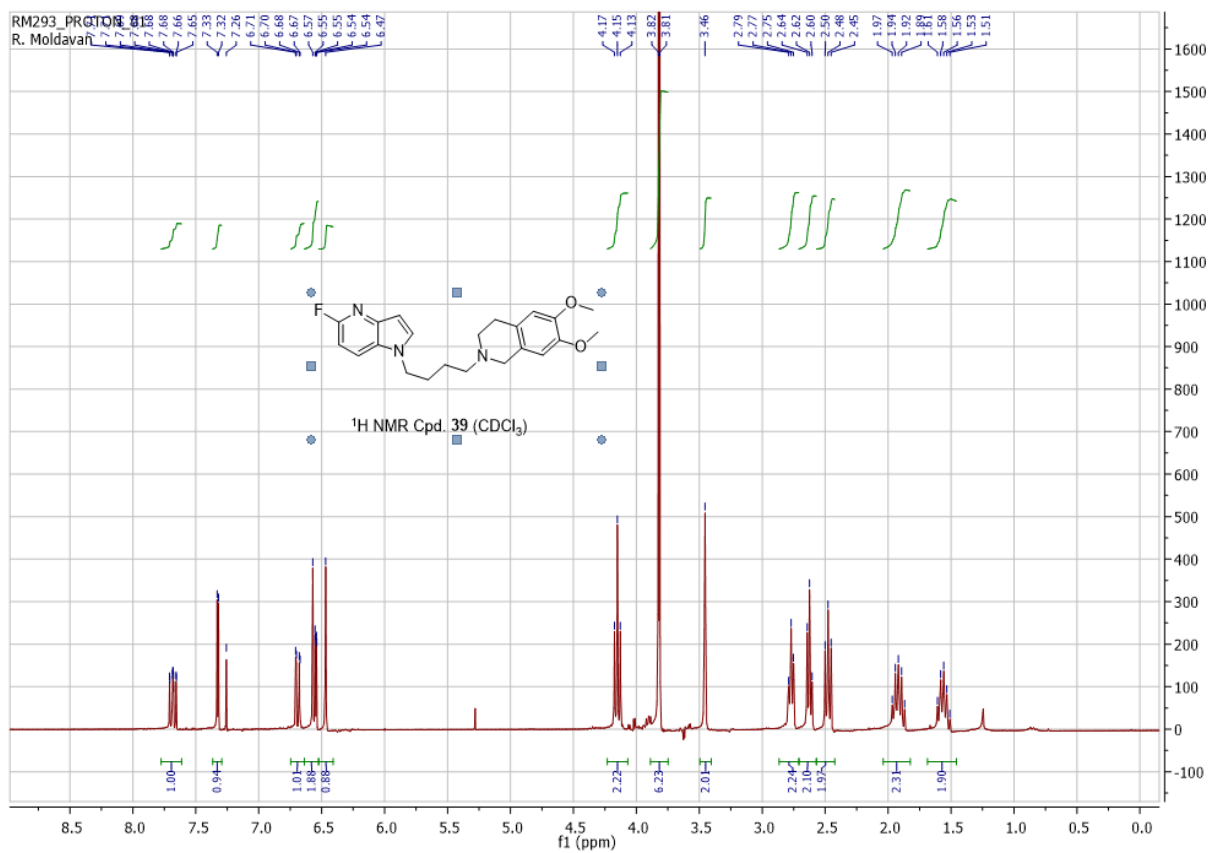

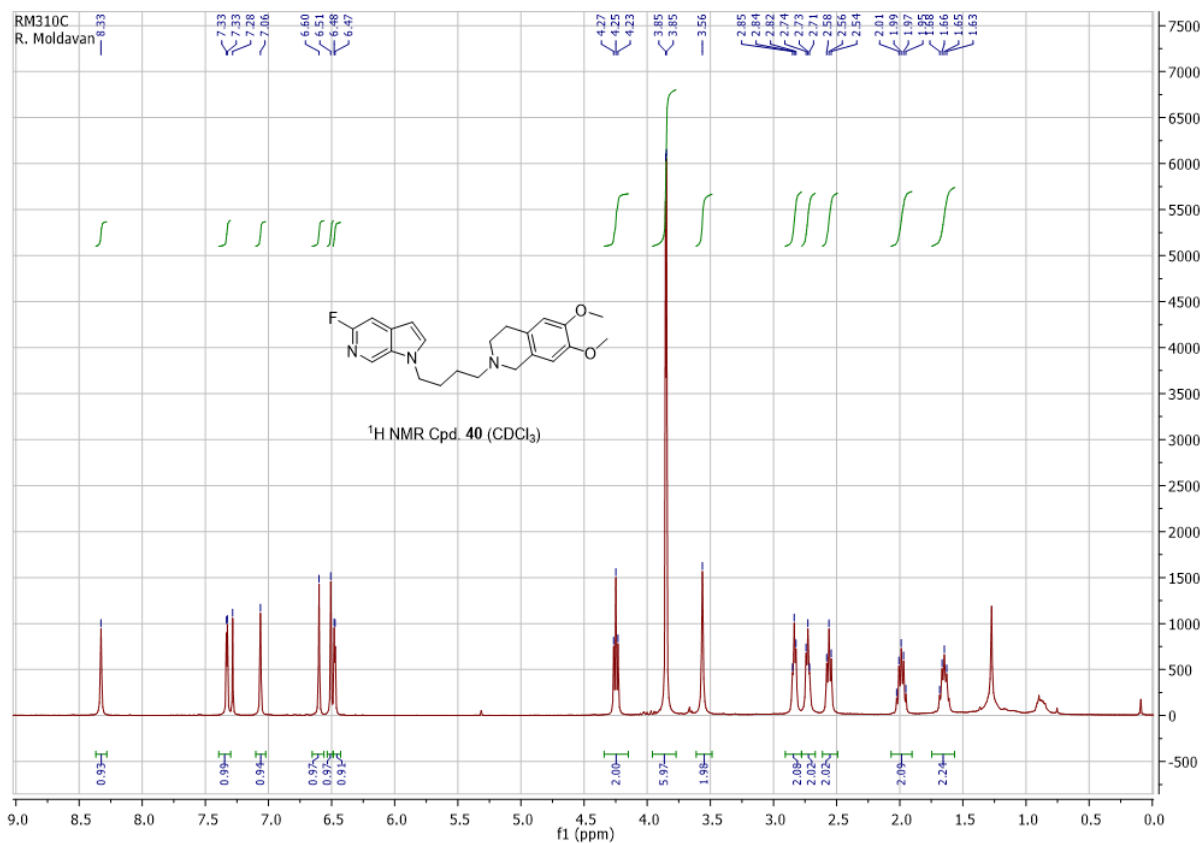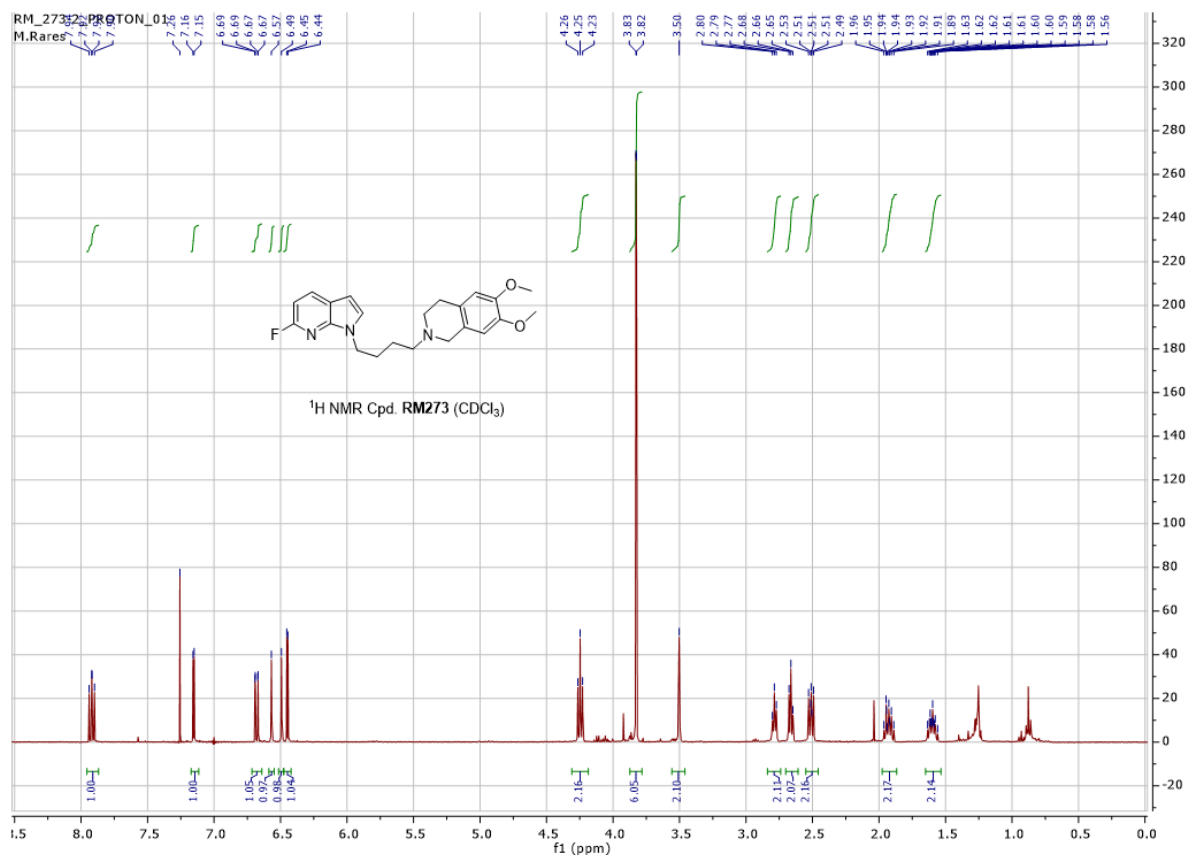



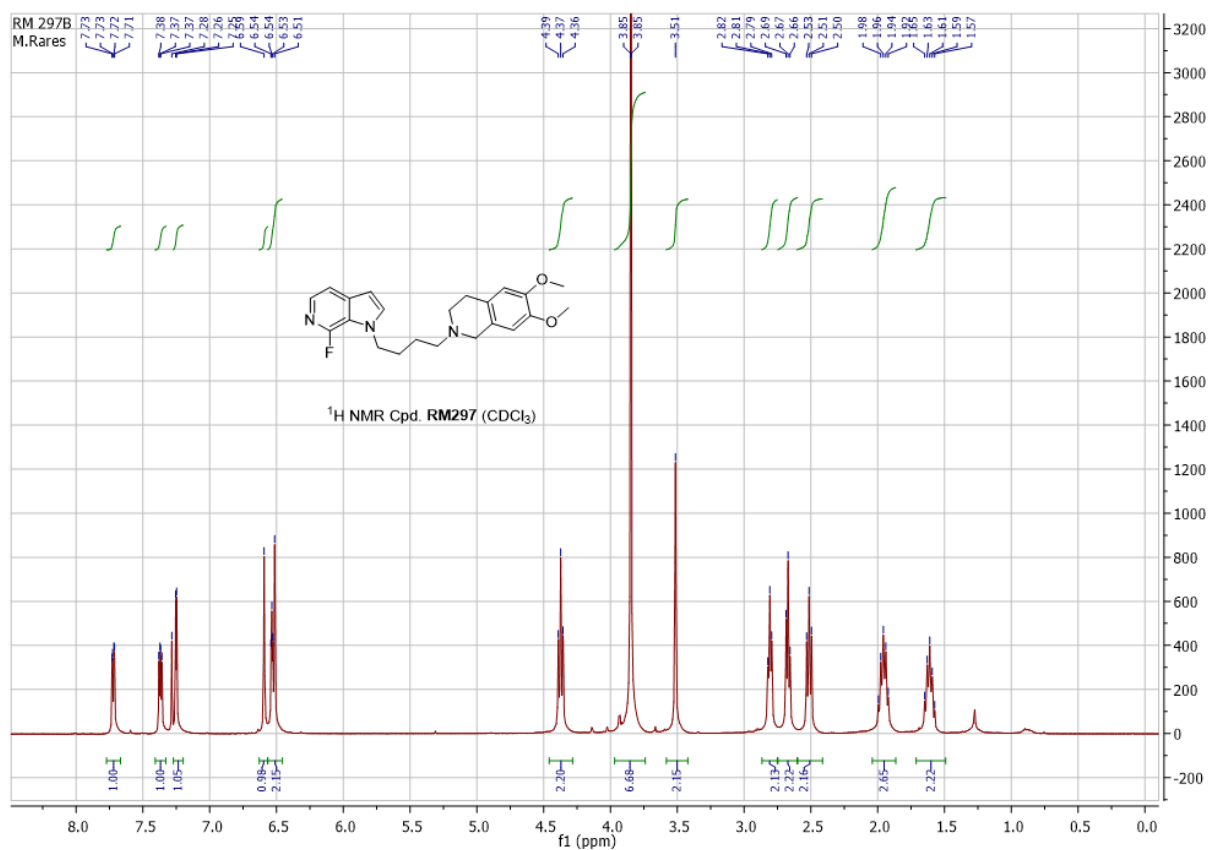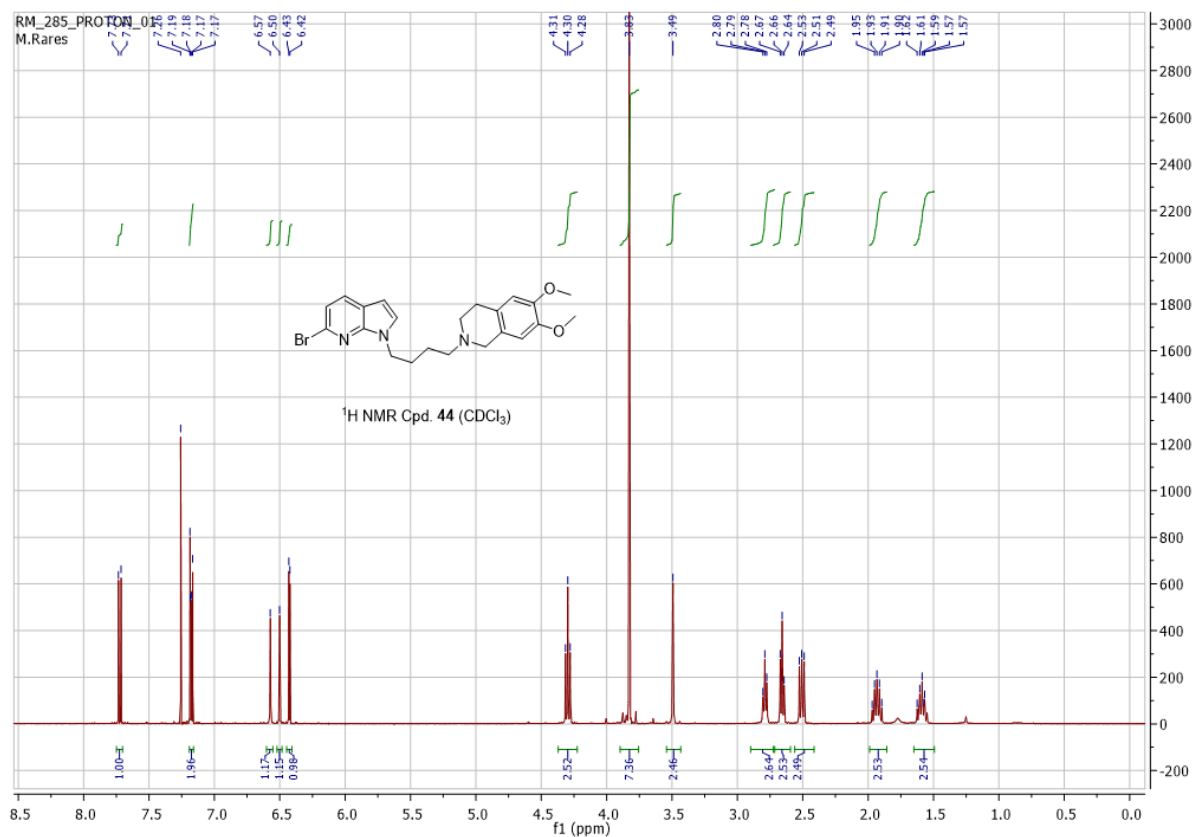

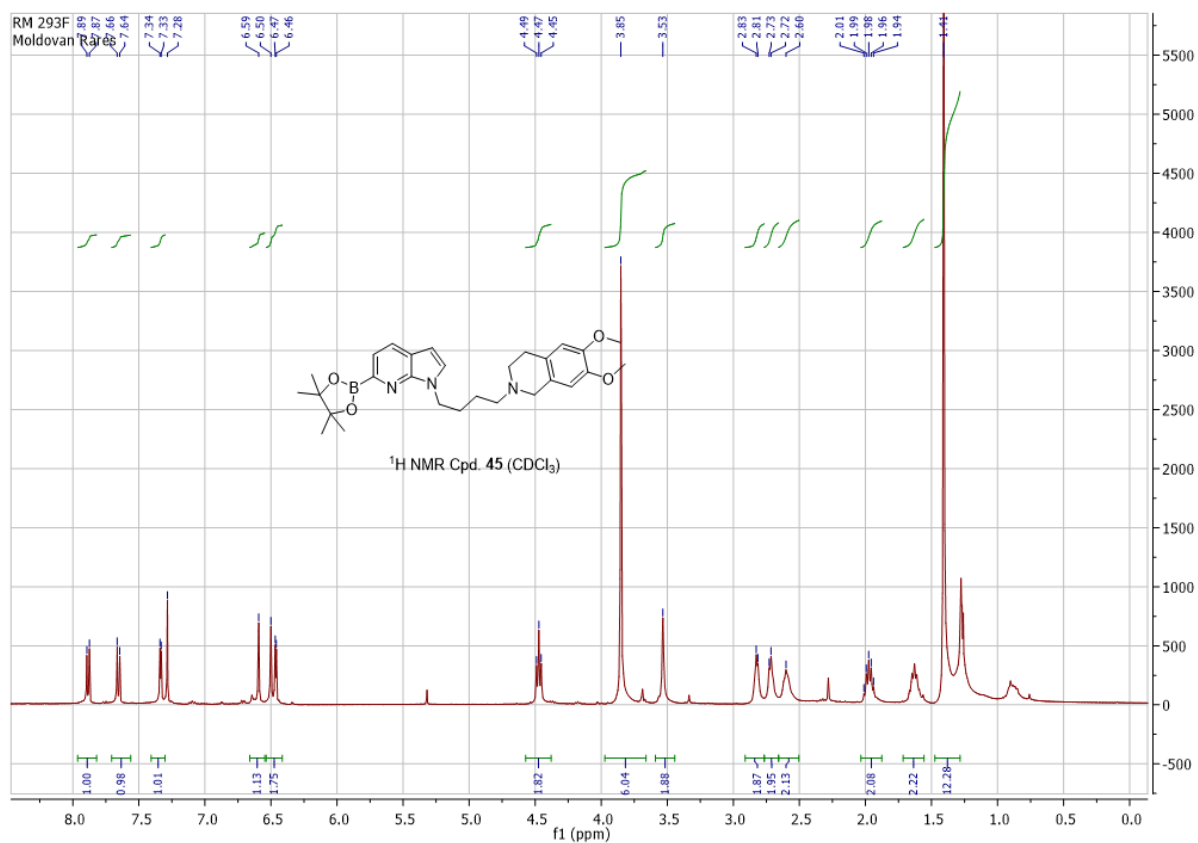

Supplement: s1 [file s1]
